# Supplementary material
Source: HighWire-hosted journal article supplement (https://srh.bmj.com/content/bmjsrh-2020-200632)
Supplement: inline-supplementary-material-2 [file inline-supplementary-material-2.pdf]

Supplementary table 2. Excluded articles

|                 |                                                                                                              |
|-----------------|--------------------------------------------------------------------------------------------------------------|
| Bekinski, 2018  | Wrong comparison (Nonoxynol-9 vs no gel)                                                                     |
| Bounds, 1995    | Wrong comparison (Nonoxynol-9 vs no gel)                                                                     |
| Cagen, 1986     | Case series (n 620) using Prentif Cavity-Rim Cervical Cap not available today                                |
| Coffey, 2008    | No outcome data according to PICO (Only acceptability)) Ortho All Flex vs SILCS diaphragm (Caya)             |
| Eliot, 1985     | No extractable data on pregnancy and compliance (Vimule cap – Cavity Rim cap)                                |
| Gallo, 2012     | Systematic review including 2 RCTs, already included as original articles                                    |
| Gollub, 1989    | Secondary re-analysis of Bernstein 1986                                                                      |
| Johnson, 1984   | Case series n<200 using an old type of cervical cap (Prentif®) not available today                           |
| Kaufman, 1960   | Case series n<200 using diaphragms of different brands with Lanesta Gel                                      |
| Koch, 1982      | Case series (n 413) using Prentif Cavity-Rim Cervical Cap not available today                                |
| Lauersen, 1986  | Case series (n 217) using Prentif Cavity-Rim Cervical cap not available today                                |
| Lehfelddt, 1984 | Case series n<200 using Prentif cervical cap with Delfen spermicidal cream/Ramses Jelly (N-9,5%)             |
| Lepine, 2015    | Cost-effectiveness study using a mathematical model. No data available.                                      |
| Mauck, 1996     | Wrong comparison (Nonoxynol-9 vs no gel) Lea's shield                                                        |
| Mauck, 1997     | No outcome data according to PICO (Not using pregnancy as outcome variable)                                  |
| Mauck, 2006     | Cohort study with wrong comparison (compares two types of FemCaps, strapped and unstrapped)                  |
| Mauck, 2017     | No outcome data according to PICO (Not using pregnancy as outcome variable)                                  |
| Powell, 1986    | Case series (n 617) using Prentif Cavity-Rim Cervical Cap and Vimule caps (15) not available today           |
| Richwald, 1989  | Case series (n 3433) using Prentif Cavity-Rim Cervical cap not available today                               |
| Shihata, 1992   | Case series n<200 (106 women using FemCap assessing acceptability)                                           |
| Shihata, 1991   | Case series n<200 (106 women using FemCap + nonoxynol 3%)                                                    |
| Schwartz, 2008  | No outcome data according to PICO (Postcoital test, comparing SILCS (Caya) with and without nonoxynol-9      |
| Trussel, 1993   | Re-analysis of two clinical studies                                                                          |
| Williams, 2007  | Wrong population (not using diaphragm as contraception). Phase I safety trial on different microbicide gels. |
