# Supplementary material
Source: HighWire-hosted journal article supplement (https://srh.bmj.com/content/bmjsrh-2020-200632)
Supplement: inline-supplementary-material-4 [file inline-supplementary-material-4.pdf]

**Fig. 1 Selection process – flow diagram**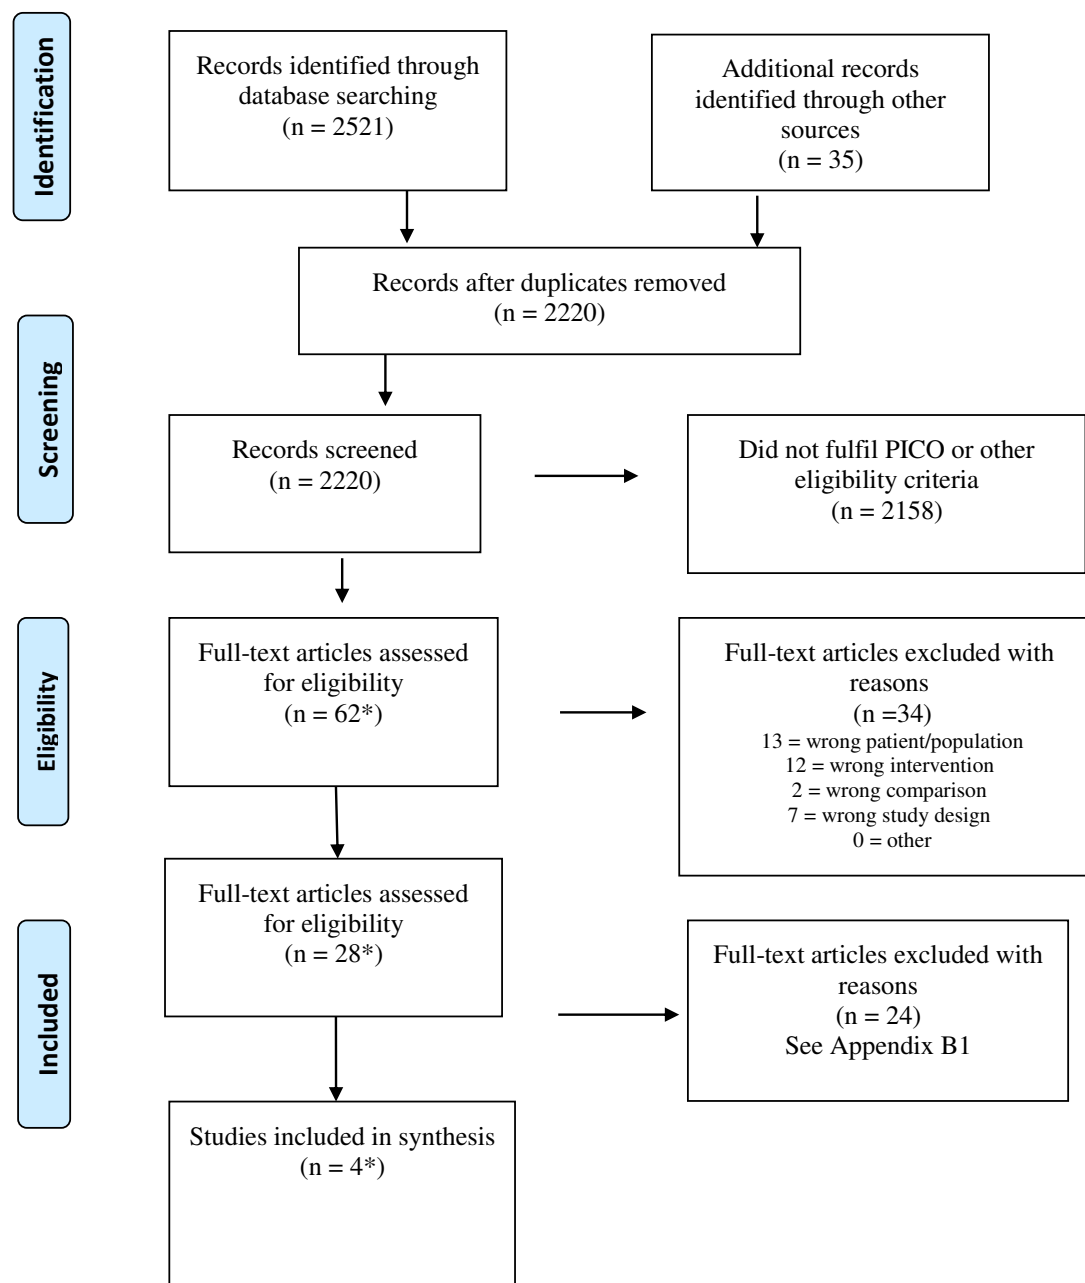

\* Includes the reference by Bernstein, 1986. The original article has not been identified but data was retrieved from Gallo, 2002, a Cochrane review.
