# Supplementary material
Source: HighWire-hosted journal article supplement (https://srh.bmj.com/content/bmjsrh-2020-200632)

Supplementary Figure 2.

Meta-analysis comparing acid-buffering gel with nonoxynol-9 gel. Outcome: Discontinuation (excluding patients with pregnancy and lost to follow-up).

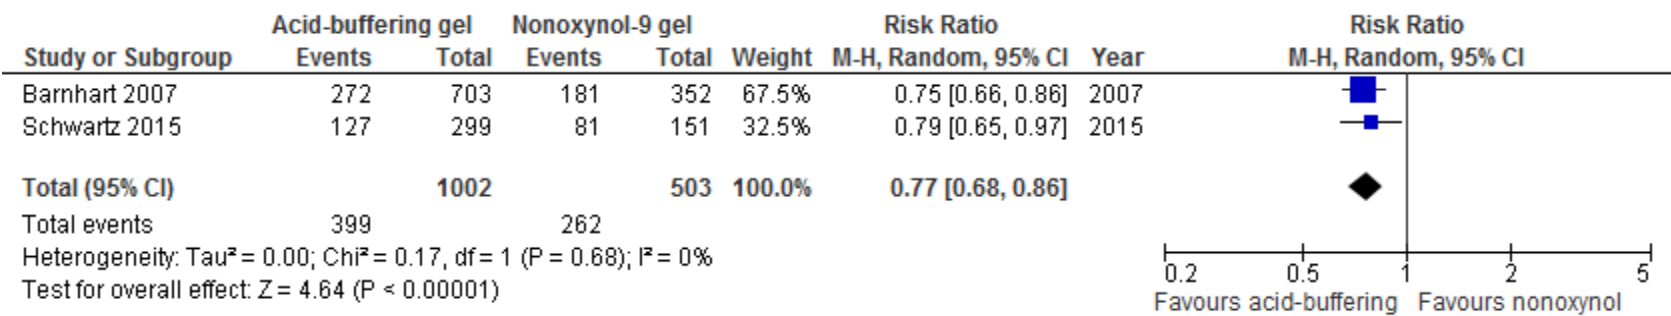

Supplement: inline-supplementary-material-5 [file inline-supplementary-material-5.pdf]
